# Supplementary material for: Homotopic contralesional excitation suppresses spontaneous circuit repair and global network reconnections following ischemic stroke
Source: eLife journal article supplement (doi:10.7554/elife.68852), 2022-06-20
Supplement: supp [file elife-68852-supp-v1.zip]

Archive with 7 entries (7 files):
- elife_poa_e68852_Figure_3_figure_supplement_1.eps
- elife_poa_e68852_Figure_4_figure_supplement_1.eps
- elife_poa_e68852_Figure_4_figure_supplement_2.eps
- elife_poa_e68852_Figure_5_figure_supplement_1.eps
- elife_poa_e68852_Figure_5_figure_supplement_2.eps
- elife_poa_e68852_Supplementary_file_1.xlsx
- elife_poa_e68852_Transparent_Reporting_File.pdf
