# Supplementary material for: Homotopic contralesional excitation suppresses spontaneous circuit repair and global network reconnections following ischemic stroke
Source: eLife journal article supplement (doi:10.7554/elife.68852), 2022-06-20
Supplement: supp [file elife-68852-supp-v1.zip › elife_poa_e68852_Supplementary_file_1.xlsx]

## Sheet: Sheet1
Abbreviation	Gene	Forward primer (5'-3')	Reverse primer (5'-3')
ACAN	Aggrecan	CCTGCTACTTCATCGACCCC	AGATGCTGTTGACTCGAACCT
AMPA1	Glutamate Receptor 1	TCCCCAACAATATCCAGATAGGG	AAGCCGCATGTTCCTGTGATT
APOE	Apolipoprotein E	CTGACAGGATGCCTAGCCG	CGCAGGTAATCCCAGAAGC
ARC	Activity Regulated Cytoskeleton Associated Protein	AAGTGCCGAGCTGAGATGC	CGACCTGTGCAACCCTTTC
ATRX	Transcriptional Regulator ATRX	GCTTGTGGACAGCAGGTCAAT	GTCACGGCTAATATCGTCACTC
BASP1	Brain Acid Soluble Protein 1	GCGAGGCCAAAAAGACTGAG	CCGCGCTGCTAGGTTTAGAG
BCAN	Brevican	TGCGCGTCAAGGTAAACGAA	GACCCCGGAATCATTGGGC
BDNF	Brain Derived Neurotrophic Factor	TCATACTTCGGTTGCATGAAGG	AGACCTCTCGAACCTGCCC
CACNG2	Calcium Voltage Gated Channel Auxiliary Subunit Gamma 2	CTGCTGCCTCGAAGGGAACT	CGGGAAGATACTCGAGGCCC
CALB2	Calretinin	TTATGGAGGCTTGGCGGAAGT	TCATAGGGCCTGTTGGCCTTC
CCK	Cholecystokinin	CTTCTCCGCTGGAACTCGCC	GCACAGACATACGCCGCTCT
CNR1	Cannabinoid Receptor 1	AAGTCGATCTTAGACGGCCTT	TCCTAATTTGGATGCCATGTCTC
CXCL12	Stromal Cell Derived Factor 1	TGCATCAGTGACGGTAAACCA	TTCTTCAGCCGTGCAACAATC
DAT	Dopamine Transporter	AAATGCTCCGTGGGACCAATG	GTCTCCCGCTCTTGAACCTC
DRD1	Dopamine Receptor D1	ATGGCTCCTAACACTTCTACCA	GGGTATTCCCTAAGAGAGTGGAC
EFNA5	Ephrin A5	ACACGTCCAAAGGGTTCAAGA	GTACGGTGTCATTTGTTGGTCT
EFNB1	Ephrin B1	TGTGGCTATGGTCGTGCTG	CCAAGCCCTTCCCACTTAGG
EPHA5	Ephrin Type-A Receptor 5	TGCACTTTCATAACGGGCACA	ACTACAAATTGCCTGACCTGAG
ERBB4	Receptor Tyrosine Protein Kinase	GTGCTATGGACCCTACGTTAGT	TCATTGAAGTTCATGCAGGCAA
FGF1	Acidic Fibroblast Growth Factor	CCCTGACCGAGAGGTTCAAC	GTCCCTTGTCCCATCCACG
GABBR1	Gamma Aminobutyric Acid Type B Receptor Subunit 1	ACGTCACCTCGGAAGGTTG	CACAGGCAGGAAATTGATGGC
GAD1	Glutamate Decarboxylase 1	CCAGCACGTACTCCTGTGAC	GGGTCTCTACGGTTCAAGGGT
GAP43	Growth Associated Protein 43	TGGTGTCAAGCCGGAAGATAA	GCTGGTGCATCACCCTTCT
GAT1	GABA Transporter 1	GAAAGCTGTCTGATTCTGAGGTG	AGCAAACGATGATGGAGTCCC
GDF10	Growth Differentiation Factor 10	CAGGACATGGTCGCTATCCAC	ACAGGCTTTTGGTCGATCATTTC
GDNF	Glial Cell Line-Derived Neurotrophic Factor	TCCAACTGGGGGTCTACGG	GCCACGACATCCCATAACTTCAT
GPHN	Gephyrin	CAACCACGACCATCAAATCCG	CCAACAAAGAAGGATCTTGGACA
GRM5	Metabotropic Glutamate Receptor 5	ACGACCATGACGACCTTCG	GGCAGGTGATACCCCTGTC
IGF1	Insulin Like Growth Factor 1	CTGGACCAGAGACCCTTTGC	GGACGGGGACTTCTGAGTCTT
MAP2	Microtubule Associated Protein 2	GCCAGCCTCAGAACAAACAG	AAGGTCTTGGGAGGGAAGAAC
NCAM1	Neural Cell Adhesion Molecule 1	ACCACCGTCACCACTAACTCT	TGGGGCAATACTGGAGGTCA
NCAN	Neurocan	TGCAACCACGGCTAAGCTC	GGGGATAAGCAGGCAATGAC
NGF	Nerve Growth Factor	CCAGTGAAATTAGGCTCCCTG	CCTTGGCAAAACCTTTATTGGG
NMDAR1	Glutamate Ionotropic Receptor Type Subunit 1	AGAGCCCGACCCTAAAAAGAA	CCCTCCTCCCTCTCAATAGC
NPTX1	Neuronal Pentraxin 1	CCCGCTTCATCTGCACTTC	TCAGCTCCCTGATGGTCTCC
NPTX2	Neuronal Pentraxin 2	GCAAACCCTCAAGGACCGCT	TGGAGCACCTCTCGGAAGTC
NPY	Neuropeptide Y	ATGCTAGGTAACAAGCGAATGG	TGTCGCAGAGCGGAGTAGTAT
NRG1	Neuregulin 1	ATGGAGATTTATCCCCCAGACA	GTTGAGGCACCCTCTGAGAC
NTF3	Neurotrophin 3	GGAGTTTGCCGGAAGACTCTC	GGGTGCTCTGGTAATTTTCCTTA
PSD95	Postsynaptic Density Protein 95	GGCGGAGAGGAACTTGTCC	AGAATTGGCCTTGAGGGAGGA
PV	Parvalbumin	ATCAAGAAGGCGATAGGAGCC	GGCCAGAAGCGTCTTTGTT
RTN4	Reticulon 4	GTTGGAAGGACAAGGTTGTTGA	GCACCAAACACCACTCCAG
RTN4R	Reticulon 4 Receptor	CCCGAAGATGAAGAGGGCGTC	CCATAACACCCATGCCAGCAG
Sigmar1	Sigma Non-Opioid Intracellular Receptor 1	CATTCGGGACGATACTGGGC	CCTGGGTAGAAGACCTCACTTTT
SLC1A2	Excitatory Amino Acid Transporter 2	ACAATATGCCCAAGCAGGTAGA	CTTTGGCTCATCGGAGCTGA
SST	Somatostatin	ACCGGGAAACAGGAACTGG	TTGCTGGGTTCGAGTTGGC
SYN3	Synapsin 3	CAATGGCTACATGCCGGAC	CCTGGGTCTTTGAACCACGG
SYNPO	Synaptopodin	CCTGCCCGTAACTTCCGTG	GAGCGGCGGTAGGGAAAAG
SYP	Synaptophysin	CAGTTCCGGGTGGTCAAGG	ACTCTCCGTCTTGTTGGCAC
SYT1	Synaptotagmin 1	CTGTCACCACTGTTGCGAC	GGCAATGGGATTTTATGCAGTTC
TGFB1	Transforming Growth Factor Beta 1	CTCCCGTGGCTTCTAGTGC	GCCTTAGTTTGGACAGGATCTG
TNC	Tenascin C	TTGCTCCCAGCATCCGTACC	ACCGTCTGGAGTGGCATCTG
TNR	Tenascin R	GGCTGGAGGTGACTACAGAAA	GAAGACCATAGGCTGTTCCTTG
VCAN	Versican	TTTTACCCGAGTTACCAGACTCA	GGAGTAGTTGTTACATCCGTTGC
VEGF3	Vascular Endothelial Growth Factor 3	GAGGTCAAGGCTTTTGAAGGC	CTGTCCTGGTATTGAGGGTGG
VGAT	Vesicular GABA Transporter	ACCTCCGTGTCCAACAAGTC	CAAAGTCGAGATCGTCGCAGT
VGLUT1	Vesicular Glutamate Transporter 1	GGTGGAGGGGGTCACATAC	AGATCCCGAAGCTGCCATAGA
VIP	Vasoactive Intestinal Peptide	AGTGTGCTGTTCTCTCAGTCG	GCCATTTTCTGCTAAGGGATTCT
GAPDH	Glyceraldehyde 3-phosphate dehydrogenase	AGGTCGGTGTGAACGGATTTG	TGTAGACCATGTAGTTGAGGTCA
